# Supplementary material for: Endoplasmic reticulum stress‐dependent autophagy inhibits glycated high‐density lipoprotein‐induced macrophage apoptosis by inhibiting CHOP pathway
Source: PubMed Central journal article supplement (PMC6433656; doi:10.1111/jcmm.14203), 2019-02-12
Supplement: JCMM-23-2954-s001.pdf [file JCMM-23-2954-s001.pdf]

**Endoplasmic reticulum stress-dependent autophagy inhibits glycated high-density lipoprotein-induced macrophage apoptosis by inhibiting CHOP pathway**

Hua Tian<sup>1, §</sup>, Yanyan Li<sup>1, §</sup>, Panpan Kang<sup>2</sup>, Zhichao Wang<sup>3</sup>, Feng Yue<sup>4</sup>, Peng Jiao<sup>1</sup>, Nana Yang<sup>1</sup>, Shucun Qin<sup>1,\*</sup>, Shutong Yao<sup>1,5,\*</sup>

**Supplementary Information**

**Supplementary table 1.** Clinical and biochemical characteristics of diabetes mellitus (DM) patients and healthy controls.

|                            | Healthy controls<br>( <i>n</i> = 35) | DM Patients<br>( <i>n</i> = 47) | <i>P</i> |
|----------------------------|--------------------------------------|---------------------------------|----------|
| Age (years)                | 45.7 ±9.7                            | 59.7 ±11.3                      | <0.01    |
| Gender(male/female)        | 19/16                                | 22/25                           |          |
| Fasting glucose (mmol/L)   | 5.02 ±0.53                           | 10.27 ±2.98                     | <0.01    |
| Triglycerides (mmol/L)     | 0.99 ±0.25                           | 1.52 ±0.65                      | <0.01    |
| Total cholesterol (mmol/L) | 4.55 ±0.94                           | 4.79 ±0.95                      | 0.25     |
| HDL-cholesterol (mmol/L)   | 1.45 ±0.35                           | 1.23 ±0.34                      | <0.01    |
| LDL-cholesterol (mmol/L)   | 2.52 ±0.55                           | 2.95 ±0.82                      | <0.01    |

Data are expressed as the mean ±SD. Differences between DM group and control group were tested using the Student's t test.

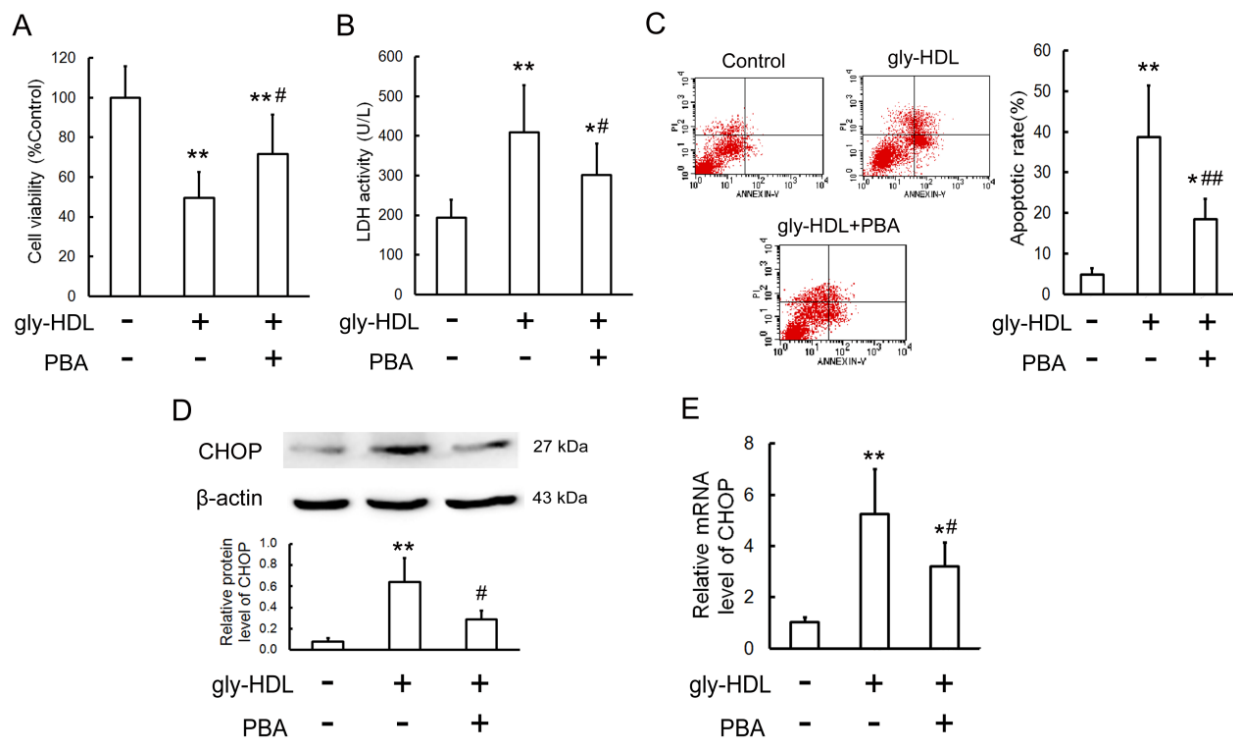

**Supplementary figure S1. Gly-HDL induces CHOP-mediated apoptosis in mouse peritoneal macrophages.** Peritoneal macrophages from C57BL/6J mice were harvested with PBS three days after intraperitoneal injection with 1 ml of 4% thioglycollate and cultured in DMEM containing 10% FBS. Cells were preincubated with or without PBA (5 mmol/L) for 1 h, and then exposed to 100 mg/L gly-HDL for 24 h. Cell viability (**A**) and LDH activity in media (**B**) were measured by MTT assay and a kit, respectively. (**C**) Cell apoptosis was determined by flow cytometry and the total apoptotic cells were expressed as the right side of the panel (Annexin V staining alone or together with PI). (**D** and **E**) The protein and mRNA levels of CHOP were analyzed by Western blot and quantitative real-time PCR, respectively. Data are expressed as the mean  $\pm$  SD of at least three independent experiments. \* $P$ <0.05, \*\* $P$ <0.01 versus control group; # $P$ <0.05, ## $P$ <0.01 versus gly-HDL group.

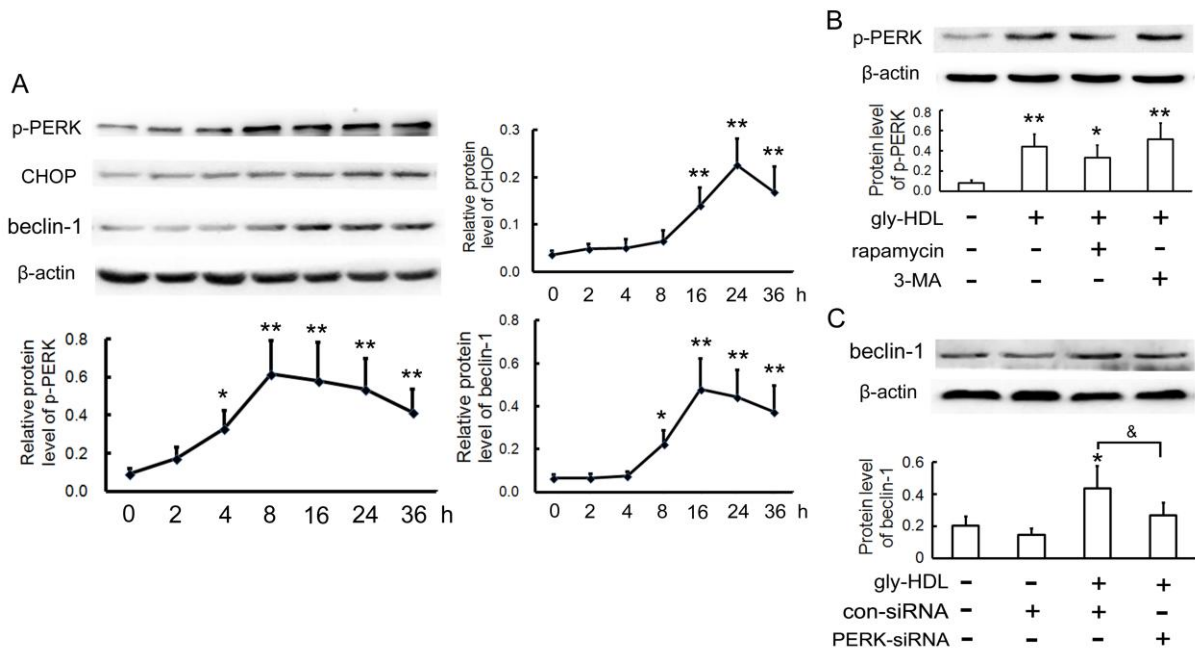

**Supplementary figure S2. The changes of p-PERK, CHOP and beclin-1 in RAW264.7 cells caused by gly-HDL in different periods. (A) Cells were treated with 100 mg/L gly-HDL for the indicated periods. (B) Cells were exposed to gly-HDL (100 mg/L) in the presence or absence of rapamycin (1  $\mu$ mol/L) or 3-MA (3 mmol/L) for 8 h. (C) Cells were transfected with PERK siRNA and treated with 100 mg/L gly-HDL for 8 h. The protein levels of p-PERK, CHOP and beclin-1 were analyzed by Western blotting. Data are expressed as the mean  $\pm$  SD of three independent experiments. \* $P$ <0.05, \*\* $P$ <0.01 versus control group; & $P$ <0.05.**
